1 **Modeling Zika Virus Congenital Eye Disease: Differential Susceptibility of Fetal Retinal**  
2 **Progenitor Cells and iPSC-Derived Retinal Stem Cells to Zika Virus Infection**

3  
4

5 Running title: Zika viral infection of human ocular cells.

6  
7  
8

9 Deisy Contreras<sup>1</sup>, Melissa Kaye Jones<sup>1</sup>, Laura E. Martinez<sup>1</sup>, Vineela Gangalapudi<sup>2</sup>, Jie Tang<sup>2</sup>,  
10 Ying Wu<sup>6</sup>, Jiagang J. Zhao<sup>7</sup>, Zhaohui Chen<sup>3,8</sup>, Shaomei Wang<sup>1,3,8</sup>, Vaithilingaraja  
11 Arumugaswami<sup>1,3,4,5\*</sup>

12

13 <sup>1</sup>Board of Governors Regenerative Medicine Institute, Cedars-Sinai Medical Center, Los Angeles,  
14 CA 90048, USA.

15 <sup>2</sup>Genomics Core, Cedars-Sinai Medical Center, Los Angeles, CA 90048, USA.

16 <sup>3</sup>Department of Biomedical Sciences, Cedars-Sinai Medical Center, Los Angeles, CA 90048,  
17 USA.

18 <sup>4</sup>Department of Surgery, Cedars-Sinai Medical Center, Los Angeles, CA 90048, USA.

19 <sup>5</sup>Department of Surgery, University of California at Los Angeles, Los Angeles CA 90095, USA.

20 <sup>6</sup>Alpine Biotech LLC, San Diego, CA, USA.

21 <sup>7</sup>Shiley Eye Institute, Department of Ophthalmology, University of California San Diego, La Jolla,  
22 California, USA.

23 <sup>8</sup>Department of Medicine, University of California at Los Angeles, Los Angeles CA 90095, USA.

24  
25

26 Correspondence:  
27 Vaithilingaraja Arumugaswami, MVSc., PhD.  
28 Email: arumugaswami@cshs.org

29  
30  
31

32 The authors declare no conflicts of interest regarding this manuscript.

33  
34  
35

36 Keywords: Zika virus; human fetal retinal pigment epithelial cells; human iPSC-derived retinal  
37 stem cells; congenital eye disease; apoptosis; nucleoside analogue

38

1  
2  
3  
4  
5  
6  
7  
8  
9  
10  
11  
12  
13  
14  
15  
16  
17  
18  
19  
20  
21  
22  
23  
24  
25  
26  
27  
28  
29  
30  
31  
32  
33  
34  
35  
36

## Summary

Zika virus (ZIKV) causes microcephaly and congenital eye disease that is characterized by macular pigment mottling, macular atrophy, and loss of foveal reflex. The cell and molecular basis of congenital ZIKV infection are not well understood. Here, we utilized a biologically relevant cell-based system on human fetal retinal pigment epithelial cells (FRPE) and iPSC-derived retinal stem cells (iRSCs) to model ZIKV-ocular cell injury processes. FRPEs were highly susceptible to ZIKV, resulting in apoptosis and decreased viability, whereas iRSCs showed reduced susceptibility. Transcriptomics and proteomics analyses of infected FRPE cells revealed the activation of innate immune and inflammatory response genes, and dysregulation of cell survival pathways, mitochondrial transmembrane potential, phagocytosis, and particle internalization. Nucleoside analogue drug treatment inhibited ZIKV replication and prevented apoptosis. In conclusion, ZIKV affects ocular cells of different developmental stages resulting in cellular injury and death, further providing molecular insight into the pathogenesis of congenital eye disease.

## 1 Introduction

2  
3 Zika virus (ZIKV) is a teratogenic vector-borne pathogen that causes detrimental congenital eye  
4 disease along with other congenital disorders, such as microcephaly, intrauterine growth  
5 restriction, and sensorineural hearing loss (Jampol and Goldstein, 2016). ZIKV is a member of  
6 the *Flaviviridae* family, comprised of other relevant human pathogens such as West Nile,  
7 Japanese Encephalitis, Dengue, and St. Louis Encephalitis viruses. ZIKV was first isolated from  
8 humans in 1952 in Uganda and Tanzania, and its main mode of transmission is vectorial  
9 through the bite of an infected *Aedes* species mosquito (*Aedes aegypti* or *Aedes albopictus*)  
10 (Hamel et al., 2016). However, new studies provide increasing evidence that ZIKV can be  
11 spread sexually from men or women, and through transplacental transmission in infected  
12 mothers (Kim and Shresta, 2016). ZIKV may gain access to the fetal eye through  
13 hematogenous route and direct ocular exposure to infected amniotic fluid *in utero* resulting in  
14 congenital eye disease. Approximately 80% of adults infected with ZIKV remain asymptomatic,  
15 while the remaining infected population exhibit mild symptoms, such as short-lived fever, rash,  
16 and joint pain, all of which are rarely life threatening (Hamel et al., 2016). ZIKV has also been  
17 linked to Guillain-Barré syndrome, which can damage nerve cells and cause temporary  
18 paralysis in infected adults (dos Santos et al., 2016; Lucchese and Kanduc, 2016; Parra et al.,  
19 2016).

20  
21 Congenital ocular defects occur at a frequent rate worldwide and approximately 20 million  
22 children under the age of 18 years suffer from some type of congenital eye disorder, resulting in  
23 more than 1.4 million cases of blindness (Chen et al., 2009; Graw, 2003; Lupo et al., 2000).  
24 Human pathogens known to cause fetal and neonatal anomalies include *Toxoplasma gondii*,  
25 Rubella virus, Cytomegalovirus (CMV), and Herpes Simplex Virus 1 (HSV-1), referred to as  
26 TORCH infections, and can be acquired by intrauterine route (Kim and Shresta, 2016). A  
27 repertoire of clinical studies on ZIKV infected fetuses have found that infection leads to a  
28 spectrum of eye anomalies during the first or second trimester of pregnancy, such as macular  
29 pigment mottling, loss of foveal reflex, intra-retinal hemorrhages, chorioretinal atrophy, and  
30 blindness during the first or second trimester of pregnancy (de Paula Freitas et al., 2016;  
31 Ventura et al., 2016a; Ventura et al., 2016b; Vogel, 2016). Approximately 35% of microcephalic  
32 babies showed posterior pole pigmentary clumping and chorioretinal atrophy in the eyes (de  
33 Paula Freitas et al., 2016). ZIKV also causes structural eye anomalies such as microphthalmia  
34 and coloboma, cataracts, and intraocular calcifications in the eye (Rasmussen et al., 2016).

1 However, the molecular mechanisms underlying the structural and developmental eye  
2 anomalies caused by ZIKV infection are not well understood.

3  
4 Recently, immunocompromised mouse model systems have been utilized to reproduce key  
5 features of human ZIKV infection, including neuronal and ocular tissue tropism (Cugola et al.,  
6 2016; Lazear et al., 2016; Li et al., 2016; Miner et al., 2016). It has been shown that ZIKV has a  
7 broader cell tropism than other flaviviruses (Miner and Diamond, 2017). A study using an  
8 *ifnar1<sup>-/-</sup>* knockout mouse model system demonstrated the presence of ZIKV in different parts of  
9 the eye, including the cornea, retinal epithelial cell layer, and tear fluid, which further contributed  
10 to conjunctivitis and uveitis (Miner et al., 2016). However, congenital eye disorder was not  
11 observed in *ifnar1<sup>+/-</sup>* fetuses of C57BL/6 *ifnar1<sup>-/-</sup>* infected mothers (Miner et al., 2016). A recent  
12 study reported that *in vitro* ZIKV infection of human retinal pigment epithelial (RPE) cells caused  
13 detrimental effects on membrane permeability by disrupting cell-to-cell junctions (Salinas et al.,  
14 2016). Altogether, fetal ocular infectious cell culture models are needed to study ZIKV  
15 pathogenesis during the early developmental stages of the eye.

16  
17 Here, we utilized second-trimester human fetal retinal pigment epithelial (FRPE) progenitor cells  
18 and human induced pluripotent stem cell (iPSC)-derived retinal stem cells (iRSCs), analogous  
19 to first-trimester retinal progenitor cells, to recapitulate the pathogenic processes of congenital  
20 ZIKV infection *in vitro* by examining the initial ocular cellular response to infection and injury  
21 using the contemporary ZIKV clinical isolate PRVABC59. We found that ZIKV infection alters  
22 cell viability by inducing programmed cell death in FRPE cells. iRSCs show differential  
23 susceptibility to ZIKV infection. Global transcriptomics and proteomics analyses of FRPE cells  
24 revealed dysregulation of cell survival pathways and VEGF signaling, and activation of innate  
25 immune and inflammatory response genes during ZIKV infection. Further antiviral drug  
26 screening against ZIKV revealed that a nucleoside analogue, 6-Azauridine, inhibited viral  
27 replication and blocked ZIKV-mediated cell death in FRPE cells.

28

29

## 30 **Results**

31

### 32 ***Fetal retinal pigment epithelial cells are susceptible to ZIKV infection***

33 To investigate the pathophysiology of ZIKV congenital eye infection, we employed an *in vitro*  
34 cell culture model system using human fetal retinal pigment epithelial cells (FRPE) from second-

1 trimester of pregnancy to study their response to ZIKV infection and evaluate changes during  
2 ocular cell injury. For this study, we utilized a contemporary clinical ZIKV strain (PRVABC59),  
3 isolated in Puerto Rico during the 2015/2016 epidemic (Petersen et al., 2016). Fetal RPE cells  
4 were verified by the presence of retinal pigment epithelium-specific markers RPE65 and  
5 bestrophin (BEST1) (Figure S1). FRPE cells do not form well-defined tight junctions, as  
6 observed for adult RPE cells (Figure S1). The FRPE cells expressed several flaviviral cell entry  
7 receptors GRP76, SDC2, HSP90AB1, TYRO3, AXL, and MERTK (Figure S1B). To understand  
8 the ZIKV cytopathic effect (CPE) in human ocular cells, FRPE cells were infected with a  
9 multiplicity of infection (MOI) of 0.1, as previously described (Contreras and Arumugaswami,  
10 2016). The FRPE cells showed active viral infection as evident by the presence of viral plaques  
11 on the cell monolayer (Figure 1A). The infected cells exhibited a distinctive raised pleomorphic  
12 phenotype and were detached from the cell's monolayer (Figure 1A). ZIKV infection was  
13 confirmed by immunocytochemistry analysis of mock and infected FRPE cells using an antibody  
14 against the flavivirus envelope (Env) structural protein (Figure 1B). ZIKV genome replication  
15 was verified by RT-qPCR at 2 and 4 days post infection (dpi) (Figure 1C). To further  
16 characterize the cellular response to ZIKV infection, we examined cell viability by measuring the  
17 intracellular ATP content using Cell Titer-Glo assay. ZIKV infection of FRPE cells decreased cell  
18 viability at 2 and 4 dpi (20% vs. 60%) as compared to mock infected cells, which exhibited 100%  
19 viability (Figure 1D). We then examined the apoptotic effects of ZIKV on FRPE cells by  
20 measuring caspase 3/7 activity. At 4 dpi, an increase in caspase 3/7 activity was detected in  
21 ZIKV-infected cells, suggesting induction of programmed cell death (Figure 1E). FRPE cells  
22 were subjected to Annexin V staining to determine the early phase of apoptosis, as defined by  
23 viral plaques. At 3 dpi, FRPE cells show double staining for Annexin V and propidium iodide  
24 (PI), while mock infected cells show little or no measurable apoptosis (Figure S2). Overall, our  
25 data shows that the ZIKV-infected FRPE cells had increased caspase 3/7 activity and reduced  
26 cell viability due to robust viral infection.

27

### 28 ***Global Transcriptomics and Proteomics Analysis of ZIKV-infected fetal RPE cells***

29

30 We then wanted to see the effects of ZIKV infection on FRPE cells at the molecular level by  
31 transcriptomics and proteomics analyses. RNA sequencing analysis of polyadenylated  
32 transcripts revealed that at 2 dpi, there were 2,040 differentially regulated genes upon ZIKV  
33 infection, with a  $p$ -value of less than 0.05 (Figure 2A and Table S2). At 3 dpi, there were 7,951  
34 differentially regulated genes upon viral infection (Figure 2A and Table S3). Figure 2B provides

1 a heat map of differentially expressed canonical interferon stimulated genes (ISGs) at 2 dpi (128  
2 genes) and 3dpi (184 genes). RT-qPCR validation of selected ISGs showed that ISG15,  
3 LAMP3, SAMHD1, RASGRP3, and C19ORF66 were induced in infected FRPE cells at both 2  
4 and 4 dpi (Figure 2C). Moreover, infected cells had induced expression of pro-inflammatory  
5 genes TNF $\alpha$ , IL-6, and ICAM1 (Figure 2C). Mouse studies have shown that ZIKV directly  
6 inhibits STAT2 during infection (Grant *et al.*, 2016). In human FRPE cells, key JAK-STAT  
7 pathway transcription factors were upregulated during infection, including IFNAR1, IFNAR2, and  
8 STAT1 (Figure 2 and Tables S2-S3). Additionally, western blot analysis showed induction of  
9 total STAT1 protein in ZIKV infected cells at 4 dpi (Figure 2D). Analysis of gene ontology  
10 categories and functional pathways showed the activation of various genes involved in the  
11 inflammasome pathway (NLRP1, NLRP3, ASC, AIM2, and NLRC4), IL-17 signaling pathway,  
12 and the VEGFA signaling pathway, which is part of tissue healing and repair processes (Figure  
13 S3 and Tables S2-S3). Infected FRPE cells showed increased levels of VEGFA as compared  
14 to mock cells (Figure 2C). Proteomics analysis identified 492 deregulated proteins ( $p$ -value of  
15 less than 0.05) involved in diverse cellular processes, which included cell growth and  
16 proliferation, cell survival, metabolism, transcription, and protein synthesis (Table S4). The top  
17 survival pathways identified in both transcriptomics and proteomics analyses were PI3/AKT and  
18 ERK/MAPK (Figure 3A). Moreover, several proteins involved in cell survival (DDX5 and PHB),  
19 phagocytosis (TXNDC5), particle internalization (RPSA), and oxidative stress response (PRDX2  
20 and TCP1) were differentially regulated (Figure 3B). Proteins involved in controlling  
21 mitochondrial membrane potential (CLIC1, CLIC4, and LDH4) were deregulated at both 2 and 4  
22 dpi (Figure 3C). The Rac signaling pathway was one of many top hits in the proteomics  
23 common pathway analysis (Figure 3A). Overall, our results indicate that fetal retinal pigment  
24 epithelial cells respond to ZIKV infection by activating innate immune, inflammatory, and stress  
25 response pathways.

26

### 27 ***Drug treatment to reduce ZIKV-mediated ocular cell death***

28

29 We then performed a small screen using selected compounds in Vero cells infected with ZIKV  
30 (Figure 4A), which have been previously shown to have anti-flaviviral activity. From this screen,  
31 we identified 6-Azauridine (6-AZA) (Figure 4B), a nucleoside analogue, as a potent inhibitor of  
32 ZIKV. Subsequently, we tested 6-AZA to test its antiviral activity against ZIKV in the context of  
33 the biologically relevant fetal RPE cells. The drug compound cyclopentenyl cytosine (CPEC)  
34 has also been shown to have a broad spectrum anti-viral effect on West Nile virus (Morrey et

1 al., 2002), which did not inhibit ZIKV in Vero cells (Figure 4A). To determine the effects of each  
2 compound on ZIKV-mediated apoptotic cell death, we measured caspase 3/7 activity after ZIKV  
3 infection and drug treatment (1  $\mu$ M, 5  $\mu$ M, and 10  $\mu$ M) at 72 hpi. There was a significant  
4 decrease in caspase 3/7 activity upon treatment with 6-AZA at the 5  $\mu$ M and 10  $\mu$ M  
5 concentrations (Figure 4C), which correlated with the significant decrease in ZIKV infection ( $IC_{50}$   
6 of 5  $\mu$ M) (Figure 4D). CPEC had similar caspase 3/7 activity as the ZIKV-only infected group  
7 (vehicle) (Figure 4C). Immunostaining confirmed the anti-viral activity of 6-Azauridine, which  
8 showed significantly reduced viral foci formation (5 and 10  $\mu$ M) as compared to the vehicle  
9 control (Figure 4E). Whereas, there was no change observed in ZIKV replication in the CPEC  
10 treated groups, which had a similar level of infected cell foci as the vehicle control (Figure 4E).  
11 Overall, the nucleoside analogue, 6-AZA, had an anti-Zika viral effect and reduced the apoptotic  
12 cellular response in fetal RPE cells.

13

#### 14 ***iPS-derived retinal stem cells (iRSCs) are susceptible to ZIKV infection***

15

16 We then evaluated the susceptibility of iRSCs, also known as eye field stem cells (EFSCs)  
17 (Zhao and Afshari, 2016), to ZIKV infection. iRSCs represent the multi-potent retinal  
18 stem/progenitor cell population present in the first trimester of the developing human eye. iRSCs  
19 are able to differentiate into RPE cells, photoreceptors, retinal ganglion cells, and corneal  
20 endothelial cells. Human retinal stem cells were differentiated from iPSCs under chemically  
21 defined conditions, which were originally derived from BJ human fibroblast cells (ATCC). The  
22 BJ-iPSCs (passage 7) were directionally induced to form retinal stem cells as shown in Figure  
23 5A (Zhao and Afshari, 2016). The expression of retinal stem cell transcription factor genes  
24 PAX6 and LHX2 were confirmed in the generated iRSCs (Figure 5B). The differentiated cells  
25 were infected with ZIKV at an MOI of 0.1. iRSCs were susceptible to ZIKV infection as shown by  
26 the presence of viral Env protein (green) in the cytoplasm of ZIKV-infected iRSCs at 2 and 4 dpi  
27 (Figure 5C). iRSCs showed increased infectivity at 4 dpi, as reflected by ZIKV genome copies  
28 (Figure 5D). iRSC viability was affected by 4 dpi with a 35% reduction in infected cells as  
29 compared to mock cells (Figure 5E). Although there was an increase in Caspase-3/7 activity by  
30 4 dpi, it was not statistically significant. In comparison to ZIKV infected FRPE cells, iRSCs are  
31 less susceptible to ZIKV infection, as iRSCs had a 4 log lower level of viral genome copies to  
32 that of FRPE cells at 2 dpi under similar infection conditions (Figures 1C and 5D). The iRSCs  
33 showed lowered expression of the selected flaviviral entry receptors AXL, heat shock proteins  
34 (HSP90AA1, and HSPA5), and integrins (ITGA3, and ITGA5) when compared to FRPE cells



1 (Figure 5E and Figure S1B). These receptors may partially explain the higher susceptibility of  
2 FRPE cells to ZIKV infection. It is possible that other intrinsic factors could contribute to the  
3 differential susceptibility. Overall, ZIKV-infected iRSCs showed a delay in viral infection, with a  
4 significant decrease in cell viability, and increased ZIKV genome copy number by 4 dpi.  
5

## 6 **Discussion**

7  
8 The severity of ocular cell injury caused by ZIKV may contribute to the outcome of congenital  
9 eye disease (de Paula Freitas et al., 2016; Miner et al., 2016). Our studies provide insight on the  
10 initial cellular response to ZIKV infection by examining cells that comprise different stages of  
11 eye development including iRSCs, which are multipotent progenitor cells that are equivalent to  
12 cells found in the first trimester of development, and human fetal RPE cells, which constitute the  
13 cells of the retina at the second-trimester (~20 weeks) (Reh and Fischer, 2006; Völkner et al.,  
14 2016). We first evaluated the permissiveness of FRPE cells to ZIKV infection. We found that  
15 FRPE cells are highly susceptible to ZIKV infection, further leading to increased apoptosis and  
16 reduced cell viability. Transcriptomics analysis of infected FRPE cells showed a type I interferon  
17 signature indicative of innate immune pathway activation. Furthermore, the infected FRPE cells  
18 responded by activation of inflammasome and IL-17 signaling pathways. These pathways can  
19 amplify the inflammatory state by recruiting first-line of defense cells, such as neutrophils and  
20 macrophages, to the infected site *in vivo*. Furthermore, proteomics analyses revealed the  
21 dysregulation of factors involved in cell survival, such as the PI3K/AKT signaling pathway.  
22

23 During development, retinal stem cells are precursor progenitor cells to RPE cells, retinal  
24 ganglion cells, corneal endothelial cells, and photoreceptors (Zhao and Afshari, 2016;  
25 Parameswaran et al., 2010; Osakada et al., 2008, Nakano et al., 2013, Zhong et al., 2014). For  
26 this reason, iRSCs are a useful *in vitro* model system to decipher the pathobiology of ZIKV eye  
27 infection at the early stages of ocular development. In this study, we showed that retinal stem  
28 cell is susceptible to ZIKV infection, but provides a lower degree of infection as compared to its  
29 downstream lineage FRPE cells. This suggests that ZIKV has differential permissivity to the  
30 state of cellular maturity of the cells. Furthermore, analysis of flaviviral entry receptor  
31 expression showed that FRPEs had higher levels of AXL, heat shock proteins, and integrins  
32 than iRSCs, which may explain differential susceptibility of these cell types. It is also possible  
33 that iRSCs may lack other pertinent cellular factors critical for robust ZIKV replication. ZIKV  
34 infection may impact the development of multiple cell fates, further leading to the generation of



1 aberrant non-functional cells and/or malformations of the eye in the developing fetus. Moreover,  
2 optic cup cells, including photoreceptors are derived from retinal stem cells and if the RSCs are  
3 damaged by ZIKV during the first trimester, then abnormal development of the optic cup, will  
4 ensue. Further studies using a retinal organoid model system (Völkner et al., 2016) may provide  
5 insight on how retinal, choroidal, and different optic cells are affected during ZIKV infection. RPE  
6 cells function as a support cell type providing nutrients, growth factors, and gas exchange to  
7 photoreceptors and other retinal cells. Death of RPE cells would indirectly affect the health of  
8 photoreceptors. Furthermore, ZIKV infection may lead to changes in the retinal architecture by  
9 altering RPE tight junctions and choroidal vascular permeability.

10

11 Recent studies show that ZIKV can halt the cell cycle and induce apoptotic cell death in human  
12 neuroprogenitors and brain organoids (Dang et al., 2016; Garcez et al., 2016; Tang et al.,  
13 2016). In our studies, ZIKV induced caspase 3/7 activity in FRPE cells. These results suggest  
14 that the tissue injury caused by apoptotic cell death could be a major contributing factor to the  
15 eye pathology observed in fetuses and affected infants. Viral particles released by apoptotic  
16 bodies can be taken up by neighboring cells and macrophages *in vivo*, in turn facilitating viral  
17 spread (Roulston et al., 1999). There is also evidence for active ZIKV infection of macrophages  
18 in the placenta of pregnant mothers, which in turn infect the developing fetus (Jurado et al.,  
19 2016). In addition, proteomics analyses of infected FRPE cells showed activation of proteins  
20 controlling mitochondrial membrane potential. This increased mitochondrial potential could be  
21 due to the infected cell undergoing active apoptotic processes. The tissue damage caused by  
22 other flaviviruses can also be attributed to the activation of the programmed cell death pathway.  
23 For example, platelets from Dengue-infected patients show characteristic apoptotic features,  
24 such as the induction of caspase -3 and -9, as well as mitochondrial polarization (Hottz et al.,  
25 2013).

26

27 A recent study describing the humoral response during ZIKV infection of pregnant women with  
28 neonatal microcephaly, showed that the amniotic fluid had increased levels of VEGF, pro-  
29 inflammatory cytokines (IL-8 and IL-6), and chemokines (IP-10 and MCP-1), which may  
30 contribute to other fetal developmental abnormalities (Ornelas et al., 2016). Consistent with this  
31 study, we observed that ZIKV induces the expression of VEGF and various chemokines  
32 (CXCL1 and CCL5) in fetal RPE cells. RPE cells require VEGF for the health of the endothelium  
33 and underlying blood vessels (Ford et al., 2011; Nagineni et al., 2012). VEGF binds to the  
34 receptor Flt1 and KDR on endothelial cells and can initiate different intracellular signaling

1 pathways, including PI3/AKT, FAK, PKC, and MAPK pathways to promote cell survival and  
2 angiogenesis (Eichmann and Simons, 2012). VEGF has also been shown to be involved in the  
3 pathogenesis of an important degenerative eye disease. In wet form of age-related macular  
4 degeneration (AMD) disease, overproduction of VEGF leads to abnormal growth of  
5 choriocapillaris (Kovach et al., 2012). Congenital eye lesions caused by ZIKV may resemble  
6 macular degeneration (de Paula Freitas et al., 2016). *In vivo* studies may provide insight on the  
7 role of VEGF during ZIKV-mediated eye disease.

8

9 To investigate the underlying molecular mechanisms of congenital ZIKV-mediated eye disease,  
10 a mouse pregnancy model that utilizes intraocular injection of ZIKV in the fetus (E8.5-9 stage)  
11 can be developed. Moreover, it will be important to investigate the Zika virulence factors that  
12 contribute to congenital eye injury and disease pathogenesis. Detailed analysis of the  
13 immunologic features of infected ocular cells *in vivo* may enable the development of  
14 immunotherapeutic strategies against ZIKV.

15

16 Currently, there are no approved antiviral agents to treat and prevent ZIKV-mediated disease. In  
17 this study, we tested drug compounds previously shown to have antiviral effects on different  
18 flaviviral pathogens, including Dengue, Yellow Fever, and West Nile viruses (Crance et al.,  
19 2003). Our *in vitro* studies show that treatment with 6-AZA blocked virus production and  
20 apoptosis in FRPE cells immediately after ZIKV infection. 6-AZA was recently shown to have  
21 anti-ZIKV activity (Pascoalino et al., 2016; Adcock et al., 2017). In general, nucleoside  
22 analogues get incorporated into the newly synthesized viral genome, further causing deleterious  
23 mutations. Furthermore, the ZIKV polymerase NS5 may be a target for such nucleoside  
24 analogues. Although vaccines are the best choice for preventing ZIKV infection in pregnant  
25 women, antiviral drugs can be used as a post-exposure therapeutic option.

26

27 In summary, this study provides a snapshot into ZIKV infection at the first and second-trimester  
28 of ocular development using biologically relevant *in vitro* ocular cell model systems. Our study  
29 presents a comprehensive assessment of pathways affected in fetal ocular cells by  
30 transcriptomics and proteomics analyses. This data set will serve as a resource to the scientific  
31 community to further dissect the pathobiology of ZIKV-mediated eye and brain diseases.

32

33

34

35

## 1 **Experimental Procedures**

2  
3  
4 **Cells.** Human fetal retinal pigment epithelial (FRPE) cells (kindly provided by Dr. Guoping Fan  
5 at UCLA) were grown in DMEM high glucose medium supplemented with 10% fetal bovine  
6 serum and 1% penicillin/streptomycin. FRPEs were originally isolated from fetal retina (~20-  
7 week-old). The cells were incubated at 37°C supplemented with 5% CO<sub>2</sub> and passaged when  
8 90% confluency was reached at approximately every third day using 0.05% Trypsin with 0.53  
9 mM EDTA (Corning, USA).

10  
11 Induced pluripotent stem cells (iPSCs)-derived retinal stem cells (iRSCs): The iPSC line was  
12 derived from BJ (ATCC® CRL-2522) human fibroblast cells (American Type Culture Collection,  
13 Manassas, VA, USA). At passage 7, iPSCs were induced into retinal stem cells (ABC010) by  
14 chemically defined conditions, as previously described (Zhao and Afshari, 2016., 2016). In brief,  
15 induced pluripotent stem cell-derived retinal stem cells (iRSCs) were grown in DMEM/F12  
16 media supplemented with 1% N2, 2% B27 without vitamin A, 7.5% BSA Fraction V, 1%  
17 GlutaMAX, 1% MEM non-essential amino acids, 1% of a proprietary cocktail (provided by Alpine  
18 Biotech LLC) for retinal stem cells, and 300 µM Ascorbic acid on matrigel coated flasks.  
19 Dissociation of the cells was achieved by Accutase (Life Technologies, USA). The expression of  
20 retinal stem cell markers was verified.

21  
22 **Zika virus.** The PRVABC59 (GenBank accession number KU501215) Zika virus strain of Asian  
23 genotype was used for the infection of human retinal pigment epithelial (FRPE) cells and iRSCs.  
24 PRVABC59 was acquired from the Centers for Disease Control and Prevention (CDC), USA.  
25 Working viral stock for the specified experiments was generated by subjecting the original ZIKV  
26 strain (Passage=3) to two additional passages in Vero cells. An established viral plaque assay  
27 was utilized to measure viral titer, as previously described (Contreras and Arumugaswami,  
28 2016).

29  
30 **Zika viral infection.** For ZIKV infection, FRPE and iRSCs were seeded in a 24-well plate with a  
31 cell density of ~2.5 x 10<sup>4</sup> cells/well. After 24-hours, ZIKV inoculum, with a multiplicity of infection  
32 (MOI) of 0.1, was formulated using the base media specified for each cell type. A total of 200 µL  
33 of viral inoculum was added to each well and the plates were incubated at 37 °C with 5% CO<sub>2</sub>  
34 for 2- 4 hrs. After the incubation period, the base media was replaced for each cell type with  
35 their respective complete media at a volume of 1 mL per well. As for the uninfected (mock)

1 group, each cell type received the specified cell-growth media that was concurrently used to  
2 prepare the viral inoculum, as described above. Each cell type included a mock infected control  
3 for the specified timepoints of 2 and 3 days post infection, for relevant comparison. At the end of  
4 each timepoint, cell lysates and RNA were harvested for downstream analyses.

5

6 ***Caspase 3/7 assay to measure apoptosis.*** Caspase-Glo 3/7 Assay (Promega, USA) was  
7 performed as per the manufacturer's protocol. At the indicated time points, ZIKV infected and  
8 mock infected FRPE cells and iRSCs were incubated with the pro-luminescent caspase-3/7  
9 substrate for 1 hour at room temperature. Subsequently, 100  $\mu$ L of lysate was transferred to a  
10 white 96-well microtiter plate for reading the luminescence signal using a luminometer (Glomax  
11 Microplate Luminometer, Promega).

12

13 ***Proteomic sample preparations and Liquid chromatography Mass Spectrometry (LC-***  
14 ***MS/MS) analysis.*** For proteomics experiments, biological quadruplicates were performed and  
15 subsequently pooled into duplicates for sample analysis using mass spectrometry. After FRPE  
16 cells were lysed in 80 mM Tris-HCl, 4% SDS, 100 mM DTT at pH 7.4, 30  $\mu$ g of protein was  
17 quantified for each sample and further digested using the FASP Protein Digestion Kit  
18 (Expedeon, San Diego, CA, USA) per manufacturer's instructions.

19

20 Liquid chromatography tandem mass spectrometry (LC-MS/MS) system was set up on a  
21 Transcend II LX-2 HTLC system connected to an Q exactiveplus equipped with an HESI ion  
22 source (QE, Thermo Scientific). A LC-MS/MS setup was used to separate the tryptic digested  
23 peptides with mobile phases A (0.1% formic acid) and B (0.1% formic acid in 100% acetonitrile).  
24 The tryptic peptide mixture (20  $\mu$ g) was loaded onto a large-inner-diameter LC column (Onyx™  
25 Monolithic C18, LC Column 50 x 4.6 mm, 130 A) and desalting for 3 min with 2% mobile phase  
26 B at a flow rate of 200  $\mu$ L/min. A series of gradients (flow rate, 200  $\mu$ L/min) was used to elute  
27 the trapped peptides for separation and then they were further applied to a Mass Spectrometer.  
28 The complex peptide mixture was separated using a 120-min linear gradient, which consisted of  
29 the following steps: 2% B for 5 min, 3% to 35% B in 100 min, 35% to 95% B in 20 min, then  
30 maintaining isocratic conditions at 95% B for 10 min, and finally reverting back to 2% B for 20  
31 min of re-equilibration.

32

33 The mass spectrometer QE was operated in positive ion mode with the data-dependent  
34 acquisition strategy. Capillary temperature was set to 320°C and spray voltage was set to 3.5

1 kV with sheath gas of 40, auxiliary gas of 20, S lens voltage was 55 volts and heater  
2 temperature was 350°C. One scan cycle included an MS1 scan ( $m/z$  400–900) acquired at a  
3 resolution (full width at half-maximum) of 70,000 with an AGC target of  $3 \times 10^6$  ions over a  
4 maximum time of 100 ms, followed by ten MS2 scans with resolution of 17,500 at in source  
5 collision-induced dissociation activation mode to fragment the ten most abundant precursors  
6 found in the MS1 spectrum with a target setting of  $1 \times 10^5$  ions, an accumulation time of 50 ms,  
7 and an isolation window of 4 Da ( $m/z$ ). Normalized HCD collision energy was set to 27%, and  
8 one microscan was acquired for each spectrum. The dynamic exclusion was enabled with the  
9 following settings: repeat count, 1; repeat duration, 30 s; exclusion list size, 500; exclusion  
10 duration, 20 s. In this study, two respective cell lysates of control groups (Mock, day 2 and day  
11 4) and experimental groups (Infected, day 2 and day 4) were analyzed sequentially.

12  
13 **Proteomic bioinformatics.** To identify proteins in mock (control) and ZIKV infected FRPE cells,  
14 mass spectroscopy data was processed by Trans-proteomic Pipeline software (Deutsch et al.,  
15 2010; Keller et al., 2005) and Skyline daily v.3.5 software (MacLean et al., 2010). Fold changes  
16 between infected and mock samples were generated using intensity values from the  
17 MPPReport plugin in Skyline daily. To identify cellular processes that are affected during ZIKV  
18 infection, the list of proteins from infected vs. mock samples at 2 and 4 dpi were input into  
19 Ingenuity Pathway Analysis (Qiagen, Redwood City, CA, USA) and network diagrams were  
20 generated.

21  
22 **RNA library preparation and sequencing.** For RNA sequencing, FRPE cells were infected  
23 with ZIKV at an MOI of 1 and cell lysates were harvested at 2 and 3 dpi. ZIKV infections were  
24 done in biological triplicates for each time point. The uninfected controls were done in biological  
25 quadruplicates and pooled in duplicates for downstream analyses. Total RNA was isolated from  
26 the cells using an RNeasy Mini Kit (QIAGEN, USA). RNase-free DNase treatment was  
27 performed on the column to remove residual DNA. Library preparation and RNA sequencing  
28 analysis were done by Cedars-Sinai Genomics Core. Samples were assessed for concentration  
29 and quality using the Thermo Scientific NanoDrop 8000 Spectrophotometer (Waltham, MA).  
30 RNA sequencing libraries were constructed using Illumina TruSeq RNA Sample Preparation Kit  
31 v2 (Illumina, San Diego, CA), as per manufacturer's instructions. Briefly, total RNA, with RNA  
32 integrity (RIN) scores of 9 or better (Agilent Bioanalyzer RNA 6000 Nano kit) were used for RNA  
33 library preparation. The poly (A)+ RNA was then purified from one microgram of total RNA from  
34 each sample using oligo-dT attached magnetic beads with two rounds of purification.

1 Subsequently, the poly (A)+ RNA was fragmented and primed for cDNA synthesis per  
2 manufacturer's recommendations. RNA adapters and barcodes were ligated to cDNA to allow  
3 for clonal amplification and multiplexing. Sequencing was done on an Illumina NextSeq 500  
4 using 75 bp single-end sequencing kit to yield an average read depth of 28 million reads per  
5 sample with a minimum number of reads for a sample of at least 16 million reads. The  
6 sequencing data was deposited to the Gene Expression Omnibus (GEO) database system with  
7 the accession number GSE83900.

8  
9 ***Analysis of RNA sequencing data.*** Raw reads obtained from RNA-sequencing were aligned  
10 to the human genome using STAR (version 2.5) (Langmead et al., 2009) with a custom human  
11 GRCh38 transcriptome reference downloaded from <http://www.gencodegenes.org>, which  
12 contains all protein-coding and non-coding RNA genes based on human GENCODE version 23  
13 annotation.

14  
15 Expression counts for each gene in all the samples were normalized by a modified trimmed  
16 mean of the M-values normalization method. The unsupervised principal component analysis  
17 (PCA) was performed with DESeq2 Bioconductor package version 1.10.1 in R version 3.2.2  
18 (Love et al., 2014). Each gene was fitted into a negative binomial generalized linear model. The  
19 Wald test was applied to assess the differential expressions between two sample groups by  
20 DESeq2. The Benjamini and Hochberg procedure (Benjamini and Hochberg, 1995) was applied  
21 to adjust for multiple hypothesis testing and differentially expressed gene candidates were  
22 selected with a false discovery rate of less than 0.10. For visualization of coordinated gene  
23 expression in the samples, a hierarchical clustering with the Pearson correlation distance matrix  
24 was performed with differentially expressed gene candidates using the Bioconductor gplots  
25 package (version 2.14.2) in R. Significantly expressed genes were assessed for pathway  
26 enrichment using DAVID release 6.7 (<https://david.ncifcrf.gov/>) and Ingenuity Pathway Analysis  
27 (<http://www.ingenuity.com/products/ipa>) (QIAGEN, Redwood City). The significantly enriched  
28 canonical pathways were defined as having a q-value of <0.01.

29  
30  
31 ***Reverse Transcription-Quantitative PCR Analysis.*** Total RNA was extracted from mock and  
32 ZIKV-infected FRPE and iRSCs at the designated time points using an RNeasy Mini Kit  
33 (QIAGEN). After treatment with RNase-free DNase, 1 µg of RNA was reverse-transcribed into  
34 cDNA using random hexamer primers and the SuperScript III Reverse Transcriptase Kit (Life



1 Technologies), as recommended by the manufacturer. The following conditions were used for  
2 cDNA amplification: 65°C for 5 min and 4°C for 1 min, followed by 55°C for 60 min and 72°C for  
3 15 min. Quantitative real-time PCR was carried out using Platinum SYBR Green qPCR  
4 SuperMix-UDG with ROX Kit (Life Technologies) by the QuantStudio™ 12K Flex Real-Time  
5 PCR System (Life Technologies). The relative concentration of each transcript was calculated  
6 using 2<sup>-ΔCT</sup> method using Glyceraldehyde 3-phosphate dehydrogenase (GAPDH) threshold  
7 cycle (C<sub>T</sub>) values for normalization. The qPCR primer pairs for the mRNA transcript targets are  
8 provided in Table S1. The following conditions were used for transcript amplification: 50°C for 2  
9 min and 95°C for 2 min, followed by 40 cycles of 95°C for 15 sec and 60°C for 1 min.

10

11 **Immunocytochemistry.** Mock and infected FRPE cells and iRSCs were fixed with ≥99.8%  
12 methanol (Sigma-Aldrich, St. Louis, MO) and incubated at -20°C for 30 minutes, then washed  
13 three times with 1X DPBS (Dulbecco's Phosphate-Buffered Saline (DPBS) (Corning  
14 Incorporated., Manassas, VA). The cells were permeabilized with 3% Bovine Serum Albumin  
15 (BSA) (Sigma Life Sciences, St. Louis, MO) and 0.1% Triton-X 100 in 1X DPBS. For ZIKV  
16 immunostaining, fixed and permeabilized cells were incubated with mouse monoclonal antibody  
17 against the Flavivirus Envelope protein (Absolute Antibody Ltd.) at a 1:200 dilution for up to 6  
18 hrs or overnight incubation at 4°C. The secondary antibodies, goat anti-mouse polyclonal  
19 antibody (Alexa Fluor 488) or goat anti-mouse polyclonal antibody (Alexa Fluor 594) (Life  
20 Technologies, USA) were added at 1:1000 dilutions and incubated for 1 hr at room temperature.  
21 For staining of RPE markers, fixed cells were incubated overnight at 4°C with anti-bestrophin  
22 (BEST-1) mouse monoclonal primary antibody (EMD Millipore, Billerica, MA), anti-retinal  
23 pigment epithelium 65 (RPE 65) monoclonal primary antibody (EMD Millipore, Billerica, MA),  
24 and anti-tight junction protein 1 (zona occludens 1) (TJP1/ZO-1) rabbit polyclonal antibody (Life  
25 Technologies, Grand Island, NY), all at a dilution of 1:200. The secondary antibodies, goat anti-  
26 mouse polyclonal antibody (Alexa Fluor 594) (Life Technologies, Grand Island, NY) and goat  
27 anti-rabbit polyclonal antibody (Alexa Fluor 568) (Life Technologies, Grand Island, NY) were  
28 added at a dilution of 1:200, and were incubated for an hour at room temperature. Cells were  
29 washed 3 times with 1X DPBS and left on the rocker for 5 minutes for each wash and in  
30 between antibody changes. Nuclei was stained with DAPI (4',6-Diamidino-2-Phenylindole,  
31 Dihydrochloride) (Life Technologies., Grand Island, NY) at a dilution of 1:1000.

32

33 **Antiviral compound analysis.** A compound screen in a dose-response was performed in Vero  
34 cells. The cells were seeded at a cell density of 1x10<sup>4</sup> cells per well in 96-well plates. After 16



1 hours of plating, the cells were infected with ZIKV (MOI of 1). After 4 hpi, the cells were treated  
2 with test compounds, ribavirin (RBV), 6-azauridine (6-AZA), glycyrrhizin (GLY), cyclopentenyl  
3 cytosine (CPEC), mycophenolic acid (MPA), sodium cholate hydrate (SCH), benzalkonium  
4 chloride (BZK) and curcumin (CRM) at the following concentrations of 1  $\mu$ M, 5  $\mu$ M, and 10  $\mu$ M in  
5 triplicates. All compounds were acquired from Sigma Aldrich unless otherwise stated. Cells  
6 were infected and treated for 72 hours, at which point viral plaques were counted. Similarly,  
7 FRPE cells were seeded at a cell density of  $1 \times 10^4$  cells per well in 96-well plates. After 16  
8 hours of plating, the cells were infected with ZIKV (MOI of 1) and immediately following  
9 infection, test compounds were added at the following concentrations of 1  $\mu$ M, 5  $\mu$ M and 10  $\mu$ M  
10 in triplicates. Cells were infected and treated for 72 hours, at which point cell viability and  
11 apoptosis was measured, and the antiviral activity was measured. The mock, vehicle (ZIKV),  
12 and infected plus compound treated samples were immunostained, as mentioned above, and  
13 were analyzed using ImageXpressMICRO (Molecular Devices, USA) with multi-wavelength cell  
14 scoring macro software. For each well, the number of nuclei (DAPI) and cell count was  
15 determined for nine different locations within the well. Data acquisition was based on DAPI-  
16 normalization.

17  
18 **Western Blot analysis.** Cell lysates were resolved by SDS-PAGE using 4-15% pre-cast  
19 gradient gels (Bio-Rad., Hercules, CA) before using the Trans-Blot turbo transfer system (Bio-  
20 Rad., Hercules, CA) to transfer to a 0.2  $\mu$ m PVDF membrane. Subsequently, the membranes  
21 were blocked with 5% skim milk and 0.2% Tween-20 in PBS at room temperature for 1 hour.  
22 The membrane was then probed with rabbit monoclonal antibodies STAT1 and beta-actin (Cell  
23 Signaling Technology, Danvers, MA). Stabilized Peroxidase Conjugated Goat anti-rabbit IgG  
24 (H+L) secondary antibody (Thermo Scientific, Grand Island, NY) was added and detected by  
25 chemiluminescence (SuperSignal West Pico Chemiluminescent Substrate kit, Thermo Scientific,  
26 Grand Island, NY).

27  
28 **Statistical analysis.** Three independent biological replicates were carried out for each of the  
29 represented experiments in the study. The error bars in the graph reflect the standard deviation.  
30 P-values were determined by a two-tailed student's t-test and significance was reported if the p  
31 value was  $p < 0.05$  (\*);  $p < 0.001$  (\*\*); and  $p < 0.0001$  (\*\*\*). For reproducibility, experiments were  
32 repeated two or more times.

33  
34

1 **Author Contributions**

2

3 D.C: designed and executed experiments, analyzed and interpreted data, and wrote the  
4 manuscript. M.K: performed experiments and analyzed data. L.E.M: performed experiments,  
5 analyzed data and wrote the manuscript. V.G. and J.T: analyzed and interpreted RNA  
6 sequencing data. Z.C: performed proteomics experiments and analyzed data. Y.W. and J.Z:  
7 provided reagents and performed iRSC induction experiments. S.W: provided reagents and  
8 analyzed and interpreted data. V.A: designed experiments, analyzed and interpreted data, and  
9 wrote the manuscript.

10

11 **Acknowledgements**

12

13 We thank Dr. Gouping Fan (UCLA, USA) for kindly providing the human fetal retinal pigment  
14 epithelial cells; Dr. Aaron Brault and Dr. Brandy Russell of the Centers for Disease Control and  
15 Prevention (CDC, USA) for providing the Zika viral strain PRVABC59; and Gustavo Garcia Jr.  
16 for technical support and editing the manuscript.

17

18 **Funding**

19

20 This work was funded by Cedars-Sinai Medical Center's Institutional Research Award to V.A.

21

22

23

24

25

26

27

28

29

30

31

32

33

34

## 1   **References**

- 2
- 3   Adcock RS, Chu Y-K, Golden JE, Chung D-H. (2017). Evaluation of anti-Zika virus activities of  
4       broad-spectrum antivirals and NIH clinical collection compounds using a cell-based,  
5       high-throughput screen assay. *Antiviral Res.* 138: 47-56.
- 6   Benjamini Y, Hochberg Y. (1995). Controlling the fast discovery rate: a practical and powerful  
7       approach to rapid testing. *J. R. Stat. Soc.* 57(1): 289-300.
- 8   Chen B-Y, Chang H-H, Chen S-T, Tsao Z-J, Yeh S-M, Wu C-Y, Lin DP-C. (2009). Congenital  
9       eye formations associated with extensive periocular neural crest apoptosis after influenza  
10      B virus infection. *Mol. Vis.* 15: 2821-2828.
- 11   Contreras D, Arumugaswami V. (2016). Zika Virus Infectious Cell Culture System and the In  
12      Vitro Prophylactic Effect of Interferons. *JOEV.* (114): e547-67.
- 13   Crance JM, Scaramozzino N, Jouan A, Garin D. (2003). Interferon, ribavirin, 6-azauridine and  
14      glycyrrhizin: antiviral compounds active against pathogenic flaviviruses. *Antiviral Res.*  
15      58(1): 73-79.
- 16   Cugola FR, Fernandes IR, Russo FB, Freitas BC, Dias JLM, Guimarães KP, Benazzato C,  
17      Almeida N, Pignatari GC, Romero S and others. (2016). The Brazilian Zika virus strain  
18      causes birth defects in experimental models. *Nature.* 534(7606): 267-271.
- 19   Dang J, Tiwari SK, Lichinchi G, Qin Y, Patil Veena S, Eroshkin Alexey M, Rana Tariq M. (2016).  
20      Zika Virus Depletes Neural Progenitors in Human Cerebral Organoids through Activation  
21      of the Innate Immune Receptor TLR3. *Cell stem cell.* 19(2): 258-265.
- 22   de Paula Freitas B, de Oliveira Dias JR, Prazeres J, Sacramento GA, Ko AI, Maia M, Belfort R,  
23      Jr. (2016). Ocular Findings in Infants With Microcephaly Associated With Presumed Zika  
24      Virus Congenital Infection in Salvador, Brazil. *JAMA ophthalmol.* 134(5): 529-535
- 25   Deutsch EW, Mendoza L, Shteynberg D, Farrah T, Lam H, Tasman N, Sun Z, Nilsson E, Pratt  
26      B, Prazen B and others. (2010). A guided tour of the Trans-Proteomic Pipeline.  
27      *PROTEOMICS.* 10(6): 1150-1159.
- 28   dos Santos T, Rodriguez A, Almiron M, Sanhueza A, Ramon P, de Oliveira WK, Coelho GE,  
29      Badaró R, Cortez J, Ospina M and others. (2016). Zika Virus and the Guillain–Barré  
30      Syndrome — Case Series from Seven Countries. *N Engl J Med.* 375(16): 1598-1601.
- 31   Eichmann A, Simons M. (2012). VEGF signaling inside vascular endothelial cells and beyond.  
32      *Curr Opin Cell Biol.* 24(2): 188-193.
- 33   Ford KM, Saint-Geniez M, Walshe T, Zahr A, D'Amore PA. (2011). Expression and Role of  
34      VEGF in the Adult Retinal Pigment Epithelium. *Invest Ophthalmol Vis Sci.* 52(13): 9478-  
35      9487.
- 36   Garcez PP, Loiola EC, Madeiro da Costa R, Higa LM, Trindade P, Delvecchio R, Nascimento  
37      JM, Brindeiro R, Tanuri A, Rehen SK. (2016). Zika virus impairs growth in human  
38      neurospheres and brain organoids. *Science.* 352(6287): 826-818.
- 39   Grant A, Ponia Sanket S, Tripathi S, Balasubramaniam V, Miorin L, Sourisseau M, Schwarz  
40      Megan C, Sánchez-Seco Mari P, Evans Matthew J, Best Sonja M and others. (2016).  
41      Zika Virus Targets Human STAT2 to Inhibit Type I Interferon Signaling. *Cell host*  
42      *microbe.* 19(6): 882-890.
- 43   Graw J. ( 2003). The genetic and molecular basis of congenital eye defects. *Nature Rev Genet.*  
44      4(11): 876-888.
- 45   Hamel R, Liegeois F, Wichit S, Pompon J, Diop F, Talignani L, Thomas F, Despres P, Yssel H,  
46      Misse D. (2016). Zika virus: epidemiology, clinical features and host-virus interactions.  
47      *Microbes Infect.* 18(7-8): 441-449.
- 48   Hottz ED, Oliveira MF, Nunes PCG, Nogueira RMR, Valls-de-Souza R, Da Poian AT, Weyrich  
49      AS, Zimmerman GA, Bozza PT, Bozza FA. (2013). Dengue induces platelet activation,

- 1 mitochondrial dysfunction and cell death through mechanisms that involve DC-SIGN and  
2 caspases. *J Thromb Haemost.* 11(5): 951-962.
- 3 Jampol LM, Goldstein DA. (2016). Zika virus infection and the eye. *JAMA ophthalmol.* 134(5):  
4 535-536.
- 5 Jurado KA, Simoni MK, Tang Z, Uraki R, Hwang J, Householder S, Wu M, Lindenbach BD,  
6 Abrahams VM, Guller S et al. (2016). Zika virus productively infects primary human  
7 placenta-specific macrophages. *JCI Insight.* 1(13): e88461.
- 8 Keller A, Eng J, Zhang N, Li X-j, Aebersold R. (2005). A uniform proteomics MS/MS analysis  
9 platform utilizing open XML file formats. *Molecular Systems Biology* 1(1):2005.0017-n/a.
- 10 Kim K, Shresta S. 2016. Neuroteratogenic Viruses and Lessons for Zika Virus Models. *Trends*  
11 *Microbiol.* 24(8): 622-636.
- 12 Kovach JL, Schwartz SG, Flynn HW, Scott IU. (2012). Anti-VEGF Treatment Strategies for Wet  
13 AMD. *Journal of Ophthalmol.* 2012:786870.
- 14 Langmead B, Trapnell C, Pop M, Salzberg SL. (2009). Ultrafast and memory-efficient alignment  
15 of short DNA sequences to the human genome. *Genome Biol.* 10(3): R25.
- 16 Lazear Helen M, Govero J, Smith Amber M, Platt Derek J, Fernandez E, Miner Jonathan J,  
17 Diamond Michael S. (2016). A Mouse Model of Zika Virus Pathogenesis. *Cell host*  
18 *microbe.* 19(5): 720-730.
- 19 Li C, Xu D, Ye Q, Hong S, Jiang Y, Liu X, Zhang N, Shi L, Qin C-F, Xu Z. (2016). Zika Virus  
20 Disrupts Neural Progenitor Development and Leads to Microcephaly in Mice. *Cell stem*  
21 *cell* 19(1): 120-126.
- 22 Love MI, Huber W, Anders S. (2014). Moderated estimation of fold change and dispersion for  
23 RNA-seq data with DESeq2. *Genome Biol.* 15(12): 550.
- 24 Lucchese G, Kanduc D. (2016). Zika virus and autoimmunity: From microcephaly to Guillain-  
25 Barre syndrome, and beyond. *Autoimmun Rev.* 15(8): 801-808.
- 26 Lupo G, Andreazzoli M, Gestri G, Liu Y, He R-Q, Barsacchi G. (2000). Homeobox genes in the  
27 genetic control of eye development. *Int J Dev Biol.* 44: 627-636.
- 28 MacLean B, Tomazela DM, Shulman N, Chambers M, Finney GL, Frewen B, Kern R, Tabb DL,  
29 Liebler DC, MacCoss MJ. (2010). Skyline: an open source document editor for creating  
30 and analyzing targeted proteomics experiments. *Bioinformatics.* 26(7): 966-968.
- 31 Miner JJ, Sene A, Richner JM, Smith AM, Santeford A, Ban N, Weger-Lucarelli J, Manzella F,  
32 Ruckert C, Govero J et al. (2016). Zika Virus Infection in Mice Causes Panuveitis with  
33 Shedding of Virus in Tears. *Cell rep.* 16(12): 3208-3218.
- 34 Miner, J.J., and Diamond, M.S. (2017). Zika Virus Pathogenesis and Tissue Tropism. *Cell host*  
35 *& microbe* 21, 134-142.
- 36 Morrey JD, Smee DF, Sidwell RW, Tseng C. (2002). Identification of active antiviral compounds  
37 against a New York isolate of West Nile virus. *Antiviral Res.* 55(1): 107-116.
- 38 Nagineni CN, Kommineni VK, William A, Detrick B, Hooks JJ. (2012). Regulation of VEGF  
39 expression in human retinal cells by cytokines: Implications for the role of inflammation  
40 in age-related macular degeneration. *J Cell Physio.* 227(1): 116-126.
- 41 Nakano, T., Ando, S., Takata, N., Kawada, M., Muguruma, K., Sekiguchi, K., Saito, K.,  
42 Yonemura, S., Eiraku, M., and Sasai, Y. (2012). Self-formation of optic cups and  
43 storable stratified neural retina from human ESCs. *Cell stem cell* 10, 771-785.
- 44 Ornelas AMM, Pezzuto P, Silveira PP, Melo FO, Ferreira TA, Oliveira-Szejnfeld PS, Leal JI,  
45 Amorim MMR, Hamilton S, Rawlinson WD et al. (2016). Immune activation in amniotic  
46 fluid from zika virus associated microcephaly. *Annals of Neurology*: Accepted Dec 15.  
47 doi: 10.1002/ana.24839.
- 48 Osakada, F., Ikeda, H., Mandai, M., Wataya, T., Watanabe, K., Yoshimura, N., Akaike,  
49 A., Sasai, Y., and Takahashi, M. (2008). Toward the generation of rod and cone

- 1 photoreceptors from mouse, monkey and human embryonic stem cells. *Nat*  
2 *Biotechnol* 26, 215-224.
- 3 Parameswaran S, Balasubramanian S, Babai N, Qiu F, Eudy JD, Thoreson WB, Ahmad I.  
4 (2010). Induced pluripotent stem cells generate both retinal ganglion cells and  
5 photoreceptors: therapeutic implications in degenerative changes in glaucoma and age-  
6 related macular degeneration. *Stem Cells*. 28(4): 695-703.
- 7 Parra B, Lizarazo J, Jiménez-Arango JA, Zea-Vera AF, González-Manrique G, Vargas J,  
8 Angarita JA, Zuñiga G, Lopez-Gonzalez R, Beltran CL et al. (2016). Guillain–Barré  
9 Syndrome Associated with Zika Virus Infection in Colombia. *N Engl J Med*. 375(16):  
10 1513-1523.
- 11 Pascoalino, B.S., Courtemanche, G., Cordeiro, M.T., Gil, L.H., and Freitas-Junior, L. (2016).  
12 Zika antiviral chemotherapy: identification of drugs and promising starting points for drug  
13 discovery from an FDA-approved library. *F1000Research* 5, 2523.
- 14 Petersen LR, Jamieson DJ, Powers AM, Honein MA. (2016). Zika Virus. *N Engl J Med*. 374(16):  
15 1552-1563.
- 16 Rasmussen SA, Jamieson DJ, Honein MA, Petersen LR. (2016). Zika virus and Birth defects --  
17 reviewing the evidence for causality. *N Engl J Med*. 374(20): 1982-1987.
- 18 Reh TA, Fischer AJ. (2006). Retinal Stem Cells. In: Irina K, Robert L, editors. *Methods in*  
19 *Enzymology*: Academic Press. p 52-73.
- 20 Roulston A, Marcellus RC, Branton PE. (1999). Viruses and Apoptosis. *Annu Rev Microbiol*. 53:  
21 577-628.
- 22 Salinas S, Erkilic N, Damodar K, Moles JP, Fournier-Wirth C, Van de Perre P, Kalatzis V,  
23 Simonin Y. (2016). ZIKA virus efficiently replicates in human retinal pigment epithelium  
24 and disturbs its permeability. *J. Virol*. doi:10.1128/JVI.02144-16.
- 25 Tang H, Hammack C, Ogden SC, Wen Z, Qian X, Li Y, Yao B, Shin J, Zhang F, Lee EM et al.  
26 (2016). Zika Virus Infects Human Cortical Neural Progenitors and Attenuates Their  
27 Growth. *Cell stem cell*. 18(5): 587-590.
- 28 Ventura CV, Maia M, Dias N, Ventura LO, Belfort R. (2016a). Zika: neurological and ocular  
29 findings in infant without microcephaly. *Lancet*. 387(10037): 2502.
- 30 Ventura CV, Maia M, Travassos SB, Martins TT, Patriota F, Nunes ME, Agra C, Torres VL, van  
31 der Linden V, Ramos RC et al. (2016b). Risk Factors Associated With the  
32 Ophthalmoscopic Findings Identified in Infants With Presumed Zika Virus Congenital  
33 Infection. *JAMA ophthalmol*. 134(8): 912-918.
- 34 Vogel G. (2016). Experts fear Zikas effects may be worse than thought. *Science Mag*:1375-  
35 1376.
- 36 Völkner M, Zschätzsch M, Rostovskaya M, Overall Rupert W, Busskamp V, Anastassiadis K,  
37 Karl Mike O. (2016). Retinal Organoids from Pluripotent Stem Cells Efficiently  
38 Recapitulate Retinogenesis. *Stem Cell Reports*. 6(4):525-538.
- 39 Zhao, J.J., and Afshari, N.A. (2016). Generation of Human Corneal Endothelial Cells via In Vitro  
40 Ocular Lineage Restriction of Pluripotent Stem Cells. *Invest Ophthalmol Vis Sci* 57,  
41 6878-6884.
- 42 Zhong, X., Gutierrez, C., Xue, T., Hampton, C., Vergara, M.N., Cao, L.H., Peters, A., Park, T.S.,  
43 Zambidis, E.T., Meyer, J.S., et al. (2014). Generation of three-dimensional retinal tissue  
44 with functional photoreceptors from human iPSCs. *Nature communications* 5, 4047.

45  
46  
47



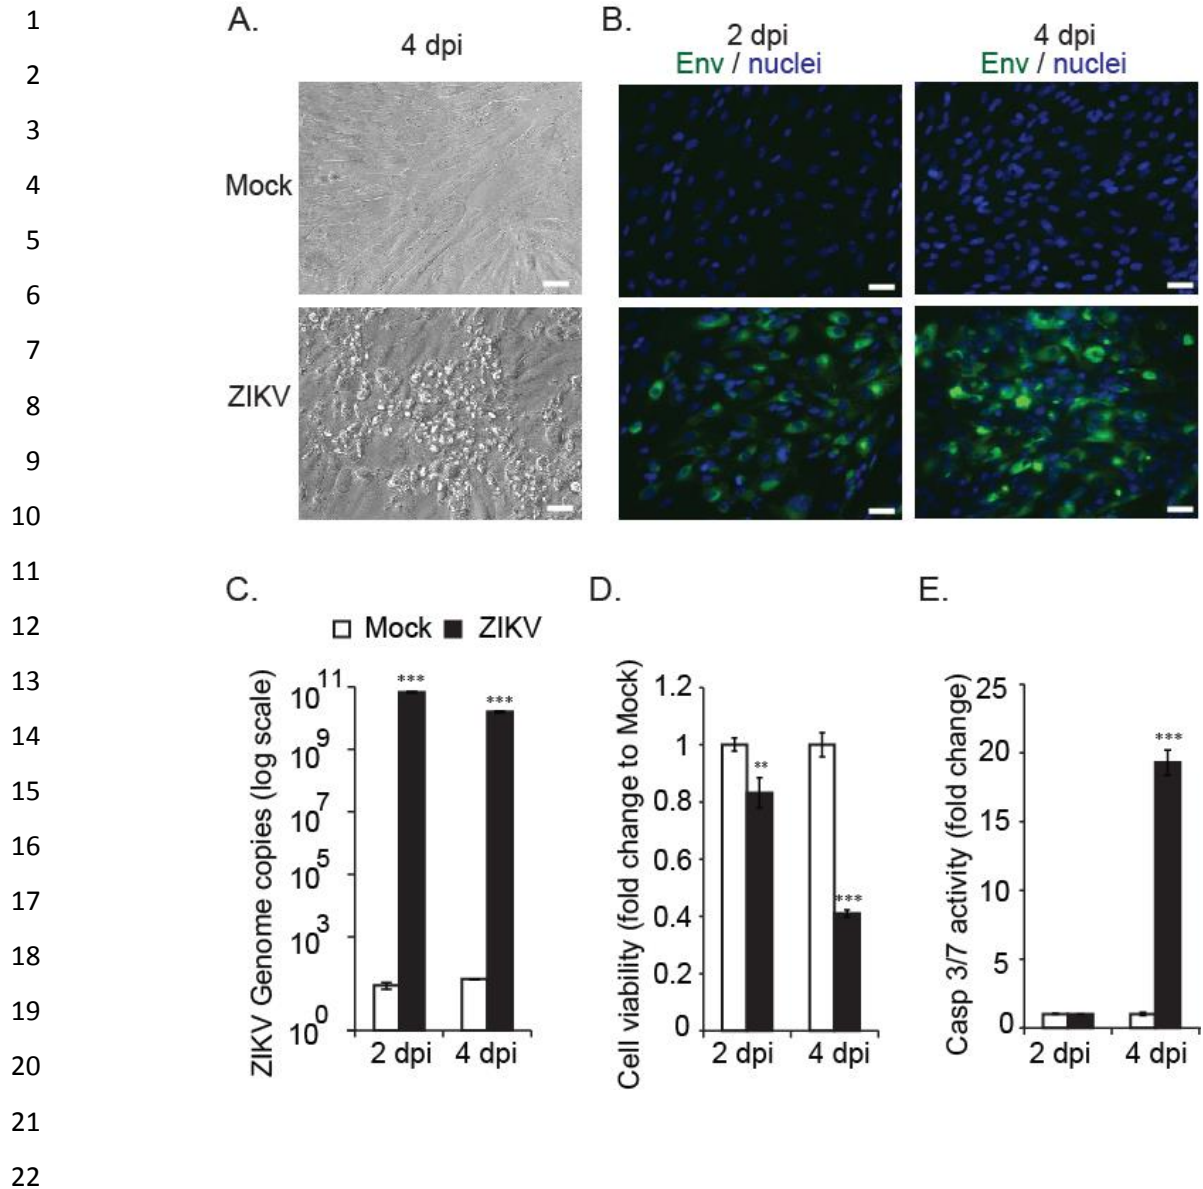

23 **Figure 1. Fetal RPE cells are susceptible to ZIKV infection.** (A) Bright field images of  
24 uninfected (mock) and ZIKV infected FRPE cells at 4 dpi. (B) Immunocytochemistry analysis of  
25 mock and ZIKV infected FRPE cells at 2 and 4 dpi. The presence of flavivirus envelope protein  
26 is shown in green and nuclei in blue. (C) Graph shows the ZIKV genome copies (log scale) of  
27 mock and ZIKV infected cells at the indicated timepoints. (D) Bar graph shows reduced cell  
28 viability for ZIKV infected cells. (E) Caspase 3/7 activity measured for mock and ZIKV-infected  
29 cells at 2 and 4 dpi. Scale bar: 25  $\mu$ m. Student t-test was performed for statistical significance if  
30 the p value was  $p < 0.05$  (\*);  $p < 0.001$  (\*\*); and  $p < 0.0001$  (\*\*\*). Representative data from three  
31 independent experiments are shown.

32  
33  
34

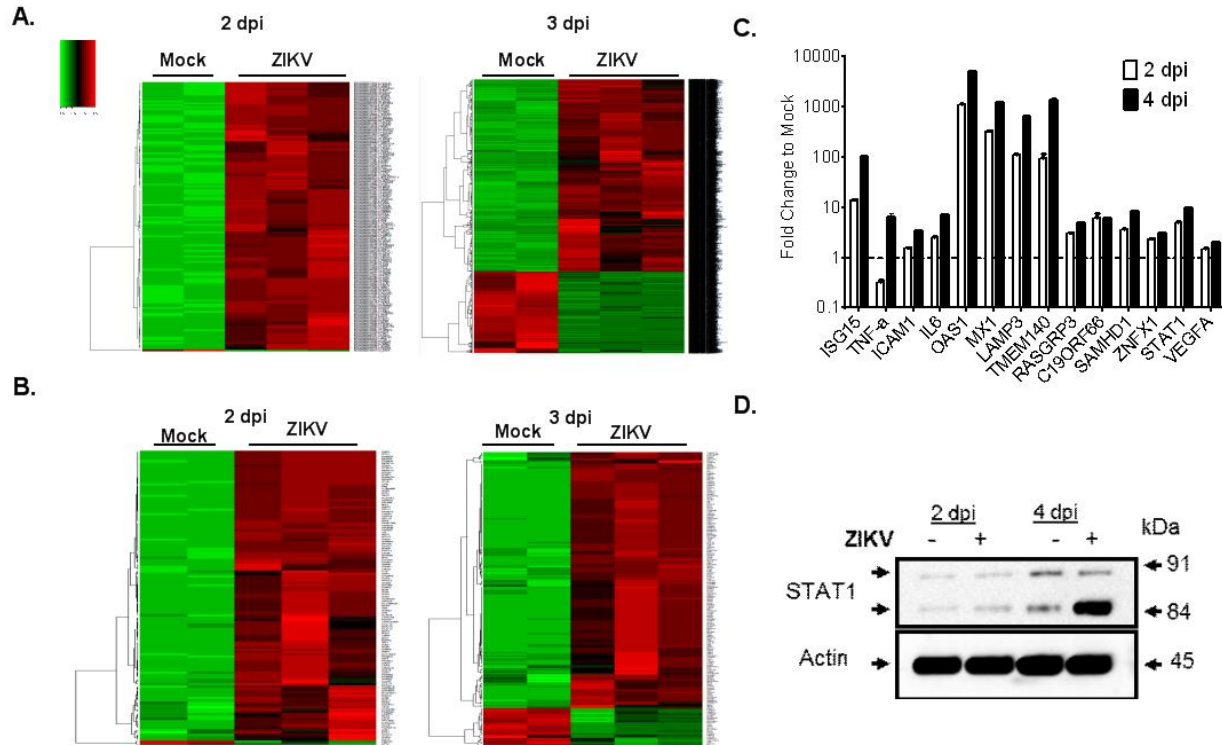

**Figure 2. ZIKV dysregulates host cellular processes and activates innate immune and inflammatory responses in fetal RPE cells.**

(A) Heat map of differentially expressed genes at 2 dpi (2,040 genes) and 3 dpi (7,951 genes) [upregulated (red); downregulated (red)]. 2-way supervised Hierarchical Clustering was performed using unique genes identified for the combined dataset. (B) Heat maps show the differential expression of known canonical ISGs in mock and ZIKV infected cells at 2 dpi (128 genes) and 3 dpi (184 genes). (C) RT-qPCR validation of selected inflammatory and IFN-stimulated genes from (B) in ZIKV infected FRPE cells at 2 and 4 dpi. The fold change to mock is shown. The horizontal dash line represents the mock value at 1 where the fold change was taken for the specified time points. (D) Western blot shows induction of STAT1 after ZIKV infection at 2 and 4 dpi. Note that higher levels of STAT1 beta subunit (84 kDa) are present in infected cells. Actin was included as a loading control. (D) Key pathways identified during ZIKV infection of FRPE cells through comprehensive transcriptomics and proteomics analyses. ZIKV infections were done in biological triplicates for each time point. The uninfected controls were done in biological quadruplicates and pooled in duplicates for downstream analyses.

1  
2  
3  
4  
5  
6  
7  
8  
9  
10  
11  
12  
13  
14  
15  
16  
17  
18  
19  
20  
21  
22  
23  
24



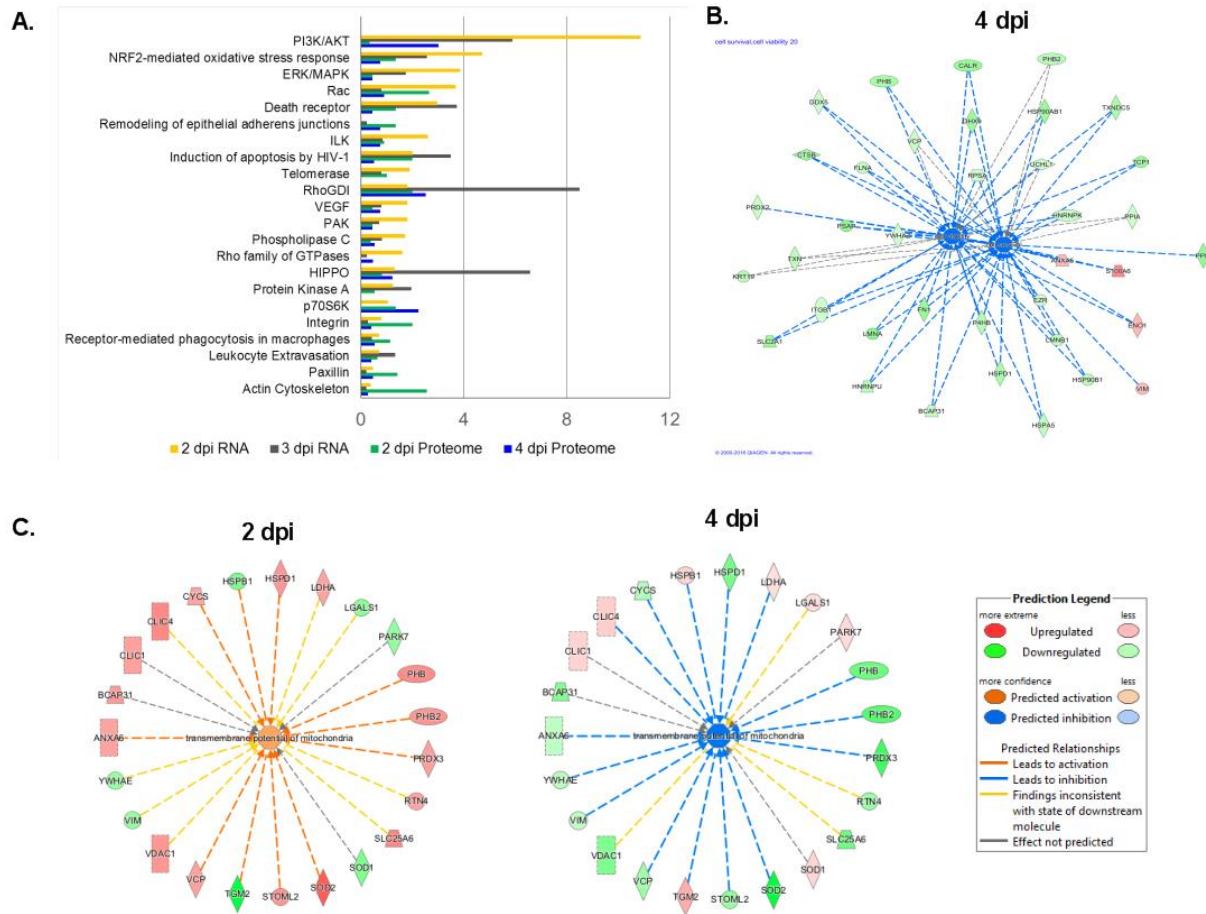

1

2

3

4 **Figure 3. Proteomics analysis of human fetal RPE cells infected with ZIKV.** (A) Graph  
 5 shows key deregulated signaling pathways identified in FRPE cells through comprehensive  
 6 proteomics and transcriptomics proteomics analyses during ZIKV infection. Interaction networks  
 7 of dysregulated factors involved in cell survival (B) and mitochondrial transmembrane potential  
 8 (C) during ZIKV infection are presented. [Upregulated (red); downregulated (green)]. For  
 9 proteomics experiments, biological quadruplicates were performed and then samples were  
 10 pooled in duplicate for mass spectrometry.

11

12

13

14

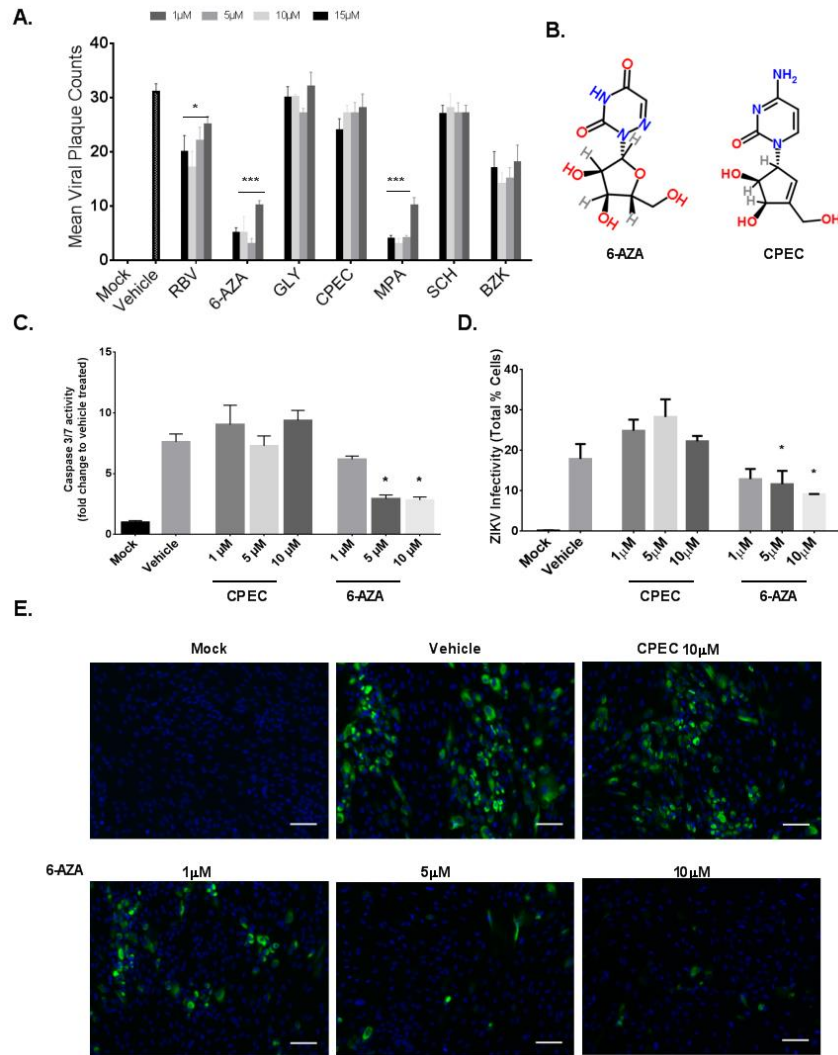

21 **Figure 4. 6-Azauridine inhibits ZIKV replication in FRPE cells.** (A) Graph depicting mean  
 22 Zika viral plaque counts in an antiviral chemical compound screen in Vero cells. Note: RBV  
 23 (ribavirin); 6-Aza (6-azauridine); GLY (Glycyrrhizin); CPEC (cyclopentenyl cytosine); MPA  
 24 (mycophenolic acid); SCH (sodium cholate hydrate); BZK (benzalkonium chloride). (B)  
 25 Chemical compound structure of 6-AZA and CPEC. (C) Caspase 3/7 activity measured for mock  
 26 (control), ZIKV infected cells (Vehicle treated) (MOI of 1), and infected, but treated cells with  
 27 CPEC and 6-Azauridine at 1, 5, and 10 μM concentrations. (D) Bar graphs depicting the  
 28 percentage of ZIKV infected cells (% cells) in a well of a 96-well plate as detected by ZIKV Env  
 29 antibody in each of the treated and control groups. (E) Immunocytochemistry images show  
 30 mock, vehicle, and ZIKV infected and drug treated cells. Treatment with 6-AZA shows a dose  
 31 dependent anti-viral effect in FRPE cells. Scale bar: 100 μm. Student t-test was performed for  
 32 statistical significance if the p value was  $p < 0.05$  (\*);  $p < 0.001$  (\*\*); and  $p < 0.0001$  (\*\*\*).  
 33 Representative data from three independent experiments are shown.

34

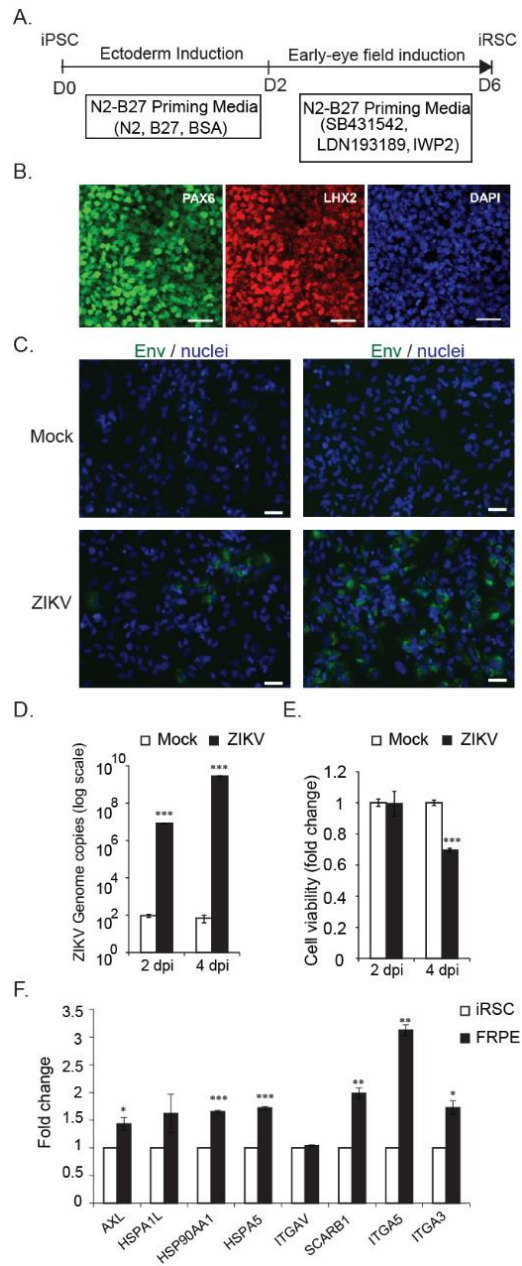

**Figure 5. iPSC-derived retinal stem cells (iRSCs) for ZIKV infection.** (A) Schematic diagram shows the experimental outline used for the differentiation of iPSCs into iRSCs. (B) Differentiated iRSCs show the expression of early eye stem cell transcription factors PAX6 and LHX2. Nuclei are stained with DAPI. Scale bar: 30  $\mu$ m. (C) Immunocytochemistry images of mock and ZIKV-infected iRSCs at 2 dpi (left panels) and 4 dpi (right panels). The presence of viral Env protein (green) is verified by immunostaining. Nuclei are stained with DAPI (blue). Scale bar: 25  $\mu$ m. (D) Graph shows the quantification of ZIKV genome copies in mock and ZIKV infected iRSCs at 2 and 4 dpi. (E) Viability of iRSCs mock and ZIKV infected 2 and 4 dpi. The fold change to mock is shown. (F) Graph depicts the expression of flaviviral entry receptors on FRPE cells as compared to iRSCs. Student t-test was performed for statistical significance if the p value was  $p < 0.05$  (\*);  $p < 0.001$  (\*\*); and  $p < 0.0001$  (\*\*\*). Representative data from three independent experiments are shown.
